# Supplementary material for: Genome-Wide Identification of Differentially Expressed Genes Associated with the High Yielding of Oleoresin in Secondary Xylem of Masson Pine (Pinus massoniana Lamb) by Transcriptomic Analysis
Source: PLoS One. 2015 Jul 13;10(7):e0132624. doi: 10.1371/journal.pone.0132624 (PMC4500461; doi:10.1371/journal.pone.0132624)
Supplement: S6 Table — (XLS) [file pone.0132624.s009.xls]

## Sheet: Sheet1
Goid	pvalue	FDR
GO:0005634	0	0
GO:0005739	5.491e-14	1.42766e-11
GO:0009644	5.64979e-05	0.00979297
GO:0046863	7.56996e-05	0.00984095
GO:0003676	0.000149538	0.0155519
GO:0055114	0.000516819	0.044791
GO:0010218	0.00167133	0.100301
GO:0005524	0.00180002	0.100301
GO:0003677	0.00202854	0.100301
GO:0030244	0.00212073	0.100301
GO:0010155	0.00212174	0.100301
GO:0009536	0.00239857	0.10239
GO:0016123	0.00257528	0.10239
GO:0009616	0.00275665	0.10239
GO:0044267	0.00364166	0.126244
GO:0000911	0.00411082	0.133602
GO:0005488	0.00474828	0.145241
GO:0004686	0.00892459	0.169328
GO:0010654	0.00892459	0.169328
GO:0030410	0.00892459	0.169328
GO:0030418	0.00892459	0.169328
GO:0030655	0.00892459	0.169328
GO:0034214	0.00892459	0.169328
GO:0045435	0.00892459	0.169328
GO:0071294	0.00892459	0.169328
GO:0090451	0.00892459	0.169328
GO:2001295	0.00892459	0.169328
GO:0006801	0.00911767	0.169328
GO:0009637	0.00988171	0.170423
GO:0010114	0.00988171	0.170423
GO:0006012	0.012431	0.170423
GO:0006084	0.0134098	0.170423
GO:0008812	0.0136282	0.170423
GO:0051567	0.0137286	0.170423
GO:0006633	0.0153179	0.170423
GO:0016246	0.017479	0.170423
GO:0006696	0.0176978	0.170423
GO:0008775	0.0176978	0.170423
GO:0010069	0.0176978	0.170423
GO:0015141	0.0176978	0.170423
GO:0015391	0.0176978	0.170423
GO:0019568	0.0176978	0.170423
GO:0033095	0.0176978	0.170423
GO:0033347	0.0176978	0.170423
GO:0033843	0.0176978	0.170423
GO:0033897	0.0176978	0.170423
GO:0035252	0.0176978	0.170423
GO:0042273	0.0176978	0.170423
GO:0045116	0.0176978	0.170423
GO:0047956	0.0176978	0.170423
GO:0050898	0.0176978	0.170423
GO:0052033	0.0176978	0.170423
GO:0071422	0.0176978	0.170423
GO:0080037	0.0176978	0.170423
GO:0016788	0.0198333	0.185793
GO:0019684	0.0205461	0.185793
GO:0042542	0.0211914	0.185793
GO:0010319	0.0212714	0.185793
GO:0050660	0.0221907	0.185793
GO:0004674	0.0229157	0.185793
GO:0009718	0.02317	0.185793
GO:0005737	0.0248497	0.185793
GO:0006346	0.0250825	0.185793
GO:0009925	0.0263214	0.185793
GO:0010338	0.0263214	0.185793
GO:0010424	0.0263214	0.185793
GO:0016119	0.0263214	0.185793
GO:0031177	0.0263214	0.185793
GO:0031326	0.0263214	0.185793
GO:0033185	0.0263214	0.185793
GO:0042440	0.0263214	0.185793
GO:0046593	0.0263214	0.185793
GO:0048826	0.0263214	0.185793
GO:0009744	0.0264397	0.185793
GO:0005618	0.0287989	0.198716
GO:0015824	0.0294252	0.198716
GO:0050790	0.0294252	0.198716
GO:0048046	0.0337296	0.198841
GO:0006729	0.0347972	0.198841
GO:0006984	0.0347972	0.198841
GO:0008124	0.0347972	0.198841
GO:0009088	0.0347972	0.198841
GO:0009942	0.0347972	0.198841
GO:0010233	0.0347972	0.198841
GO:0016656	0.0347972	0.198841
GO:0048518	0.0347972	0.198841
GO:0048830	0.0347972	0.198841
GO:0080043	0.0347972	0.198841
GO:0080044	0.0347972	0.198841
GO:0090116	0.0347972	0.198841
GO:0005886	0.0347972	0.198841
GO:0006412	0.0373458	0.20959
GO:0003886	0.0431271	0.20959
GO:0003989	0.0431271	0.20959
GO:0004449	0.0431271	0.20959
GO:0004485	0.0431271	0.20959
GO:0008281	0.0431271	0.20959
GO:0009969	0.0431271	0.20959
GO:0010216	0.0431271	0.20959
GO:0010291	0.0431271	0.20959
GO:0032450	0.0431271	0.20959
GO:0035195	0.0431271	0.20959
GO:0035197	0.0431271	0.20959
GO:0043066	0.0431271	0.20959
GO:0046429	0.0431271	0.20959
GO:0046677	0.0431271	0.20959
GO:0051171	0.0431271	0.20959
GO:0009723	0.044158	0.210662
GO:0048513	0.044158	0.210662
